# Supplementary material
Source: PubMed Central journal article supplement (PMC4791813)
Supplement: CJN.07900715_CJN07900715SupplementaryData.pdf [file CJN.07900715_CJN07900715SupplementaryData.pdf]

**The NEFRONA investigators:** Aladrén Regidor, M. José, Hospital Comarcal Ernest Lluch (Calatayud); Almirall, Jaume y Ponz, Esther, Corporació Parc Taulí (Barcelona); Arteaga Coloma, Jesús, Hospital de Navarra; Bajo Rubio, M. Auxiliadora, Hospital La Paz (Madrid); Belart Rodríguez, Montse, Sistemes Renals (Lleida); Bielsa-García, Sara, Hospital Obispo Polanco (Teruel); Bover Sanjuan, Jordi, Fundació Puigvert. IIB Sant Pau (Barcelona); Bronsoms Artero, Josep, Clínica Girona ; Cabezuelo Romero, Juan B. y Muray Cases, Salomé, Hospital Reina Sofía (Murcia); Calviño Varela, Jesús, Hospital Universitario Lugas Augusti (Lugo); Caro Acevedo, Pilar, Clínica Ruber (Madrid); Carreras Bassa, Jordi, Diaverum Baix Llobregat (Barcelona); Cases Amenós, Aleix y Massó Jiménez, Elisabet, Hospital Clínic (Barcelona); Castilla Pérez, Jesús, Hospital de la Defensa (Zaragoza); Cigarrán Guldris, Secundino y López Prieto, Saray, Hospital Da Costa (Lugo); Comas Mongay, Lurdes, Hospital General de Vic (Barcelona); Comerma, Isabel, Hospital General de Manresa (Barcelona); Compte Jové, M. Teresa, Hospital Santa Creu Jesús (Tarragona); Cuberes Izquierdo, Marta, Hospital Reina Sofía (Navarra); de Álvaro, Fernando y Hevia Ojanguren, Covadonga, Hospital Infanta Sofía (Madrid); de Arriba de la Fuente, Gabriel, Hospital Universitario Guadalajara; del Pino y Pino, M<sup>a</sup> Dolores, Complejo Hospitalario Universitario Torrecardenas (Almería); Diaz-Tejeiro Izquierdo, Rafael, Hospital Virgen de la Salud (Toledo); Dotori, Marta, Hospital Quirón Marbella (Málaga); Duarte, Verónica, Hospital de Terrassa (Barcelona); Estupiñan Torres, Sara, Hospital Universitario Canarias (Santa Cruz de Tenerife); Fernández Reyes, María José, Hospital de Segovia; Fernández Rodríguez, M<sup>a</sup> Loreto, Hospital Príncipe de Asturias (Madrid); Fernández, Guillermina, Clínica Santa Isabel (Sevilla); Galán Serrano, Antonio, Hospital General Universitario de Valencia; García Cantón, Cesar, Hospital Universitario Insular de Gran Canaria; García Herrera, Antonio L., Hospital Universitario Puerto Real (Cádiz); García Mena, Mercedes, Hospital San Juan Dios (Zaragoza); Gil Sacaluga, Luis y Aguilar, Maria, Hospital Virgen del Rocío (Sevilla); Gorriz, José Luis, Hospital Universitario Doctor Peset (Valencia); Huarte Loza, Emma, Hospital San Pedro (La Rioja); Lerma, José Luis, Hospital Universitario Salamanca (Salamanca); Liebana Cañada, Antonio, Hospital de Jaén (Jaén); Marín Álvarez, Jesús Pedro, Hospital San Pedro de Alcántara (Cáceres); Martín

Alemanya, Nàdia, Hospital Josep Trueta (Girona); Martín Garcia, Jesús, Hospital Nuestra Sra Sonsoles (Ávila); Martínez Castela, Alberto, Hospital Universitari Bellvitge (Barcelona); Martínez Villaescusa, María, Complejo Hospitalario Universitario de Albacete; Martínez, Isabel, Hospital Galdakao (Bilbao); Moina Eguren, Iñigo, Hospital Basurto (Bilbao); Moreno Los Huertos, Silvia, Hospital Santa Bárbara (Soria); Mouzo Mirco, Ricardo Hospital El Bierzo Ponferrada (León); Munar Vila, Antonia, Hospital Universitario Son Espases (Islas Baleares); Muñoz Díaz, Ana Beatriz, Hospital Virgen del Consuelo (Valencia); Navarro González, Juan F., Hospital Universitario Nuestra Señora de Candelaria (Santa Cruz de Tenerife); Nieto, Javier y Carreño, Agustín, Hospital General Universitario de Ciudad Real; Novoa Fernández, Enrique, Complejo Hospitalario de Ourense; Ortiz, Alberto y Fernandez, Beatriz, IIS-Fundación Jiménez Díaz (Madrid); Paraíso, Vicente, Hospital Universitario del Henares (Madrid); Pérez Fontán, Miguel, Complejo Hospitalario Universitario A Coruña; Peris Domingo, Ana, Hospital Francesc de Borja (Valencia); Piñera Haces, Celestino, Hospital Marqués de Valdecilla (Santander); Prados Garrido, M<sup>a</sup> Dolores, Hospital Universitario San Cecilio (Granada); Prieto Velasco, Mario; Hospital de León; Puig Marí, Carmina, Hospital d'Igualada (Barcelona); Rivera Gorrín, Maite, Hospital Ramon y Cajal (Madrid); Rubio, Esther, Hospital Puerta del Hierro (Madrid); Ruiz, Pilar, Hospital Sant Joan Despí Moisès Broggi (Barcelona); Salgueira Lazo, Mercedes y Martínez Puerto, Ana Isabel, Hospital Virgen Macarena (Sevilla); Sánchez Tomero, José Antonio, Hospital Universitario de la Princesa (Madrid); Sánchez, José Emilio, Hospital Universitario Central de Asturias; Sans Lorman, Ramon, Hospital Figueres (Girona); Saracho, Ramon, Hospital de Santiago (Vitoria); Sarrias, Maria y Prat, Oreto, Hospital Vall Hebron (Barcelona); Soler, María José y Barrios, Clara, Hospital del Mar (Barcelona); Sousa, Fernando, Hospital Rio Carrión (Palencia); Toran, Daniel, Hospital General Jerez (Cadiz); Tornero Molina, Fernando, Hospital Sureste (Madrid); Usón Carrasco, José Javier, Hospital Virgen de la Luz (Cuenca); Valera Cortes, Ildefonso, Hospital Virgen de la Victoria (Málaga); Vilaprinco del Perugia, M. Merce, Institut Català Urologia i Nefrologia (ICUN) (Barcelona); Virto Ruiz, Rafael C., Hospital San Jorge (Huesca).
